# Supplementary material for: Partial Deletion of the Sulfate Transporter SLC13A1 Is Associated with an Osteochondrodysplasia in the Miniature Poodle Breed
Source: PubMed Central journal article supplement (PMC3530542; doi:10.1371/journal.pone.0051917), 2012-12-26
Supplement: pone.0051917.s002.pdf [file pone.0051917.s002.pdf]

**Table S1. Supplemental information describing serial amplicons used to localize upstream and downstream breakpoints.**

| Amplicon           | Forward Primer Sequence | Reverse Primer Sequence  | Product (bp) | Chr | Start      | Stop       | AFF | NON |
|--------------------|-------------------------|--------------------------|--------------|-----|------------|------------|-----|-----|
| DEL_Upstream_10*   | GAGACCTTCCCTTGGTTTCC    | ACCAACACCCCTTCTGTCTG     | 480          | 14  | 63,599,279 | 63,599,758 | +   | +   |
| DEL_Upstream_09    | GACACAGGCAGAGGGAGAAG    | AGCTGCCCACTCATTACCAC     | 474          | 14  | 63,600,103 | 63,600,576 | -   | +   |
| DEL_Upstream_08    | GGCAAAGGAGAGCAAAGAGA    | GGTCACCTCACTTCATCAGTCA   | 522          | 14  | 63,600,754 | 63,601,275 | -   | +   |
| DEL_Upstream_07    | AACCCCTAGCTCTCCTGGAA    | TATCTGCTTCCCCTGGACAC     | 496          | 14  | 63,601,372 | 63,601,867 | -   | +   |
| DEL_Upstream_06    | TTAGTGCCCCAGAGGTTACG    | CAGCTCTCGGCAGCTCTC       | 492          | 14  | 63,602,008 | 63,602,499 | -   | +   |
| DEL_Upstream_05    | CAGGCCTCACCCACACAG      | ACACCTCGTCGTGGTCCTC      | 450          | 14  | 63,602,981 | 63,603,430 | -   | +   |
| DEL_Upstream_04    | TGAGGACTGTGAGGACGTTG    | TGTGTGGTGATGACATTTGCT    | 500          | 14  | 63,603,716 | 63,604,215 | -   | +   |
| DEL_Upstream_03    | AGTGAGGGGAGACGATTGTG    | GGGTAATTTCCCTTTGGA       | 467          | 14  | 63,604,857 | 63,605,323 | -   | +   |
| DEL_Upstream_02    | ACCAGATGTCCCACTGATG     | ACTGGGCTCACAGGTCAGAG     | 483          | 14  | 63,605,606 | 63,606,088 | -   | +   |
| DEL_Upstream_01**  | GGAAATCCCTGCTGACTTGA    | GAGTGCCTACTGCCCTTTGT     | 453          | 14  | 63,607,792 | 63,608,244 | 0   | 0   |
| DEL_Downstream_01  | TCTGAGTGGAAGAGGAGTCCA   | AATTGCAGAGAGGAGCCAGA     | 400          | 14  | 63,722,082 | 63,722,481 | -   | +   |
| DEL_Downstream_02  | CCCACCACTTCTATTGCTC     | GGAGACCCAGGATTGAGTCG     | 461          | 14  | 63,722,714 | 63,723,174 | -   | +   |
| DEL_Downstream_03  | CTGGCCCTTAGTTCAGGTCA    | GCAATTGCAATGCCTACCTC     | 407          | 14  | 63,723,560 | 63,723,966 | -   | +   |
| DEL_Downstream_04  | TCTCTTGCCAGGAAACAAGAA   | CCATGATTGGTCCTGCTTTT     | 449          | 14  | 63,724,349 | 63,724,797 | -   | +   |
| DEL_Downstream_05  | ACACGGTGGCACCAGACA      | CCCATCTTCCCATCATCA       | 510          | 14  | 63,725,236 | 63,725,745 | -   | +   |
| DEL_Downstream_06  | AGGACCAGGGTGGAGGAT      | TTCATGGTAGACAGGGAGAGG    | 508          | 14  | 63,726,965 | 63,727,472 | -   | +   |
| DEL_Downstream_07  | TTTGTTTAAATCACTTGGCACA  | GAAAATGAAAATGAAGGGGATAGA | 519          | 14  | 63,727,749 | 63,728,267 | -   | +   |
| DEL_Downstream_08  | GTGCACTCATGCTCTGCTGT    | TGGCTTATCCCTGATTTGTCTT   | 449          | 14  | 63,728,744 | 63,729,192 | -   | +   |
| DEL_Downstream_09  | TCCTGATGTTTTAGTGTGAAGCA | TCTGTGCCATTTGCTGAAAG     | 519          | 14  | 63,729,669 | 63,730,187 | -   | +   |
| DEL_Downstream_10* | CGACGTTTGTGGGTCACAT     | CAAGAATATGGGCCCTTTGGA    | 516          | 14  | 63,730,511 | 63,731,026 | +   | +   |
| DEL_Downstream_11  | GCCTAAGCTTGATCGACTT     | CAGTCCCTGTTGGAGAAGG      | 493          | 14  | 63,731,511 | 63,732,003 | +   | +   |
| DEL_Downstream_12  | CAGGTCCCTCAGCTTGTGTA    | CCAAGGAGATCCTGGATTAGC    | 524          | 14  | 63,732,471 | 63,732,994 | +   | +   |
| DEL_Downstream_13  | ATTTCTCCAGCCCATCATCA    | CTGGCTCAGTGCATTATCTG     | 485          | 14  | 63,733,467 | 63,733,951 | +   | +   |
| DEL_Downstream_14  | AGCTGATGCTCTTGTGCTGA    | GGAAAAGAAAAGCAGAGTTCCA   | 479          | 14  | 63,734,418 | 63,734,896 | +   | +   |
| DEL_Downstream_15  | CAGAAATGAGGGGACAGTGG    | TCCATGATTGCACATGGTGT     | 516          | 14  | 63,735,380 | 63,735,895 | +   | +   |
| DEL_Downstream_16  | GGATTGAACAAGACACGTGAAA  | AGTACGCAGGGAGCCAACTA     | 499          | 14  | 63,736,329 | 63,736,827 | +   | +   |
| DEL_Downstream_17  | GGATCCCAGGATGGTTTAT     | GCAATGTGTGGCAGTTATGG     | 407          | 14  | 63,737,316 | 63,737,722 | +   | +   |
| DEL_Downstream_18  | ACTCCAGATCCCATGCAAC     | ACTGTTACGCAAGGGGATTG     | 516          | 14  | 63,738,042 | 63,738,557 | +   | +   |

Primer pairs defined amplicons used to localize deletion breakpoints based on pattern of amplification in affected (AFF) and nonaffected (NON) dogs scored as either amplifiable (+) or not amplifiable (-). All experiments were performed in triplicate.

\*Primers used to clone actual breakpoints by amplifying product that spanned the deletion in a homozygous (affected) dog.

\*\*Primer pair excluded because of failed PCRs in control samples.

The forward primer of DEL\_Upstream\_10 and the reverse primer of DEL\_Downstream\_10 yielded a 1.8 kb (Exp. 1,851) bp PCR product in a non-affected dog.
