# Supplementary material for: Partial Deletion of the Sulfate Transporter SLC13A1 Is Associated with an Osteochondrodysplasia in the Miniature Poodle Breed
Source: PubMed Central journal article supplement (PMC3530542; doi:10.1371/journal.pone.0051917), 2012-12-26
Supplement: pone.0051917.s003.pdf [file pone.0051917.s003.pdf]

**Table S2. Additional primers used in this study.**

| <b>Name</b>          | <b>Primer Sequence</b>                   | <b>Start</b> |
|----------------------|------------------------------------------|--------------|
| DEL_Upstream_10F_T3* | aattaaccctcactaaagggGAGACCTTCCCTTGGTTTCC | 63,599,279   |
| dnD-R_T7*            | taatacgactcactatagggCACGTGGGCTTGTCAGAATA | 63,730,120   |
| WT_Rev-VIC**         | CAGATGCTGATCAGAAACATCTAT                 | 63,729,824   |
| Mut_Rev-FAM**        | TCCCCATGTAAGCTTTTCCA                     | 63,599,981   |
| Universal Forward**  | CACGTGGGCTTGTCAGAATA                     | 63,730,120   |
| LR-Forward***        | TTGTTTGATGTCTAGATTTGGCTTGCTTCATAGACC     | 63,662,018   |
| LR-Reverse***        | CTCCAGAGGCCTAAGAGCAACAACCAGAAATGAT       | 63,672,379   |

All primer sequences were from Chr 14.

Lowercase sequences denote artificial tags for fluorescence and sequencing.

\*Primers used to clone and sequence breakpoints with T3 and T7 tags.

Breakpoint cloning yielded a 945 bp product.

\*\*Primers used in three primer fluorescence-based DNA test.

\*\*\*Primers used for long-range PCR; product was subsequently used as probe for FISH.

Long-range PCR yielded a 10,394 bp product.
